# Supplementary material
Source: ML conference proceedings conference paper supplement (https://openreview.net/forum?id=N9AQSdXjpy)
Supplement: supplementary_material [file attachment]

# Supplement for “Efficient uniform approximation using Random Vector Functional Link networks”

Palina Salanevich, Utrecht University  
Olov Schavemaker, Utrecht University

Here you may find parts of proofs omitted in the main article. The numbering herein employed is the same as in the main article.

We remind the reader that  $K \subset \mathbb{R}^m$  is compact,  $f : K \rightarrow \mathbb{R}$  is  $\ell$ -Lipschitz, and

$$\begin{aligned}\tilde{f}(x) &= \rho\left(|f(a)| - \ell|x - a|\right) \operatorname{sg} f(a); \\ g(x) &= (2\pi)^{-m} \int F(v) \exp(i\langle v, x \rangle - |v|^2/2\lambda^2) \Psi(v/\lambda) dv; \\ h(x) &= (2\pi)^{-m/2} \lambda^m \mathbb{E}\left(|F(\lambda \mathbf{n})| \Psi(\mathbf{n}) \left[|\mathbf{n}| > \vartheta\right] c(\lambda \mathbf{n}, x)\right).\end{aligned}$$

Furthermore,  $H_1, \dots, H_p$  are iid copies of  $G(\mathbf{w}, \mathfrak{t})\rho(\langle \mathbf{w}, \diamond \rangle + \mathfrak{t})$  defined in Lemma 4 of the main paper.

**Lemma 1.**  *$\tilde{f}$  is a compactly supported  $\ell$ -Lipschitz extension of  $f$ .*

*Proof.* All that remains to be shown is that  $\tilde{f}$  is  $\ell$ -Lipschitz; the rest was shown in the main paper.

Let  $x_1, x_2 \in \mathbb{R}^m$ . Following [4] suppose WLOG that  $|\tilde{f}(x_1)| \geq |\tilde{f}(x_2)|$ . In other words,

$$\rho\left(|f(a_1)| - \ell|x_1 - a_1|\right) \geq \rho\left(|f(a_2)| - \ell|x_2 - a_2|\right).$$

If  $f(a_1)f(a_2) > 0$ , then

$$\begin{aligned}
|\tilde{f}(x_1) - \tilde{f}(x_2)| &= \left| \rho\left(|f(a_1)| - \ell|x_1 - a_1|\right) - \rho\left(|f(a_2)| - \ell|x_2 - a_2|\right) \right| \\
&= \rho\left(|f(a_1)| - \ell|x_1 - a_1|\right) - \rho\left(|f(a_2)| - \ell|x_2 - a_2|\right) \\
&\leq \rho\left(|f(a_1)| - \ell|x_1 - a_1|\right) - \rho\left(|f(a_1)| - \ell|x_2 - a_1|\right) \\
&\leq \left| \rho\left(|f(a_1)| - \ell|x_1 - a_1|\right) - \rho\left(|f(a_1)| - \ell|x_2 - a_1|\right) \right| \\
&\leq \left| \left(|f(a_1)| - \ell|x_1 - a_1|\right) - \left(|f(a_1)| - \ell|x_2 - a_1|\right) \right| \\
&= \ell \left| |x_2 - a_1| - |x_1 - a_1| \right| \leq \ell|x_1 - x_2|,
\end{aligned} \tag{1}$$

since  $\rho$  is evidently nondecreasing and 1-Lipschitz.

If  $f(a_1)f(a_2) \leq 0$ , however, we must distinguish three further cases.

If additionally  $|\tilde{f}(x_2)| > 0$ , i.e.,  $|f(a_2)| - \ell|x_2 - a_2| > 0$ , then

$$\begin{aligned}
|\tilde{f}(x_1) - \tilde{f}(x_2)| &= \rho\left(|f(a_1)| - \ell|x_1 - a_1|\right) + \rho\left(|f(a_2)| - \ell|x_2 - a_2|\right) \\
&= \left(|f(a_1)| - \ell|x_1 - a_1|\right) + \left(|f(a_2)| - \ell|x_2 - a_2|\right) \\
&= |f(a_1)| + |f(a_2)| - \ell|x_2 - a_2| - \ell|x_1 - a_1| \\
&= |f(a_1) - f(a_2)| - \ell|x_2 - a_2| - \ell|x_1 - a_1| \\
&\leq \ell|a_1 - a_2| - \ell|x_2 - a_2| - \ell|x_1 - a_1| \\
&\leq \ell|x_2 - a_1| - \ell|x_1 - a_1| \leq \ell|x_1 - x_2|.
\end{aligned}$$

If additionally  $|\tilde{f}(x_1)| > 0$  and  $|f(a_2)| - \ell|x_2 - a_2| \leq 0$ , that is,  $\tilde{f}(x_2)$  is zero, then

$$\begin{aligned}
|\tilde{f}(x_1) - \tilde{f}(x_2)| &= |\tilde{f}(x_1)| = |\tilde{f}(x_1)| - |\tilde{f}(x_2)| \\
&= \rho\left(|f(a_1)| - \ell|x_1 - a_1|\right) - \rho\left(|f(a_2)| - \ell|x_2 - a_2|\right),
\end{aligned}$$

which is (1). Lastly, if both  $\tilde{f}(x_1)$  and  $\tilde{f}(x_2)$  are zero, then  $|\tilde{f}(x_1) - \tilde{f}(x_2)| = 0$ , whence the desired Lipschitz continuity of  $\tilde{f}$  readily follows. □

**Lemma 2.**  $\|\tilde{f} - g\|_\infty \leq \frac{\ell}{\lambda} \left(2 - 2^{1/3}am^{-2/3}\right) \sqrt{m}$ .

*Proof.* Using various substitutions yields that

$$\begin{aligned}
& (2\pi)^{-m} \int F(v) \exp(i\langle v, x \rangle - |v|^2/2\lambda^2) \Psi(v/\lambda) dv = \\
& (2\pi)^{-m} \iint \tilde{f}(u) \exp(-i\langle v, u \rangle) \exp(i\langle v, x \rangle - |v|^2/2\lambda^2) \Psi(v/\lambda) du dv = \\
& (2\pi)^{-m} \iint \tilde{f}(u) \exp(i\langle v, x - u \rangle - |v|^2/2\lambda^2) \Psi(v/\lambda) dv du = \\
& (2\pi)^{-m} \int \tilde{f}(x - t) \int \exp(i\langle v, t \rangle - |v|^2/2\lambda^2) \Psi(v/\lambda) dv dt = \\
& (2\pi)^{-m} \int \tilde{f}(x - s/\lambda) \int \exp(i\langle w, s \rangle - |w|^2/2) \Psi(w) dw dt = \\
& \int \tilde{f}(x - s/\lambda) (\delta_Z * \psi)(s) ds,
\end{aligned}$$

where the second equality follows readily from Fubini's theorem because  $\tilde{f}$  and  $\Psi$  are compactly supported. In the main article it was shown that

$$\|\tilde{f} - g\|_\infty \leq \frac{\ell}{\lambda} \int |s| (\delta_Z * \psi)(s) ds,$$

so all that remains to be shown is that  $\int |s| (\delta_Z * \psi)(s) ds \leq (2 - 2^{1/3} a m^{-2/3}) \sqrt{m}$ .

Since  $\psi$  is a pdf,  $\psi = \delta_X$  for some random variable  $X$ . Thus,

$$\int |s| (\delta_Z * \psi)(s) ds = \int |s| (\delta_Z * \delta_X)(s) ds = \mathbb{E}|Z + X| \leq \mathbb{E}|Z| + \mathbb{E}|X|.$$

Since  $|Z|$  is chi distributed with  $m$  degrees of freedom, Wendel's inequality [6] yields that

$$\mathbb{E}|Z| = \frac{\Gamma((m+1)/2)}{\Gamma(m/2)} \sqrt{2} \leq \sqrt{m}.$$

By Jensen's inequality and [3, thm 5.1],

$$\mathbb{E}|X| \leq \sqrt{\int |x|^2 \psi(x) dx} = 2j_\nu / \sqrt{m}.$$

Indeed, as follows from the scaling property of the Fourier transform,

$$\begin{aligned} \int |x|^2 \mathcal{F}^{-1}\left\{(\omega * \omega)\left(\diamond/\sqrt{m}\right)\right\}(x) dx &= \\ m^{m/2} \int |x|^2 \mathcal{F}^{-1}\{\omega * \omega\}(x\sqrt{m}) dx &= \\ \frac{1}{m} \int |u|^2 \mathcal{F}^{-1}\{\omega * \omega\}(u) du &= 4j_\nu^2/m. \end{aligned}$$

We now claim that  $2j_\nu/\sqrt{m} < \sqrt{m} - 2^{1/3}am^{-1/6}$ . In [5], it has been proven that

$$j_\nu < \nu - a(\nu/2)^{1/3} + \frac{3}{20}a^2(\nu/2)^{-1/3}$$

for all  $\nu > 0$ . If  $m \geq 3$ , then  $\nu = m/2 - 1 > 0$ , so

$$\begin{aligned} 2j_\nu/\sqrt{m} &< \sqrt{m} - 2/\sqrt{m} - 2^{2/3}a(m/2 - 1)^{1/3}/\sqrt{m} + \frac{6}{20}a^2(\nu/2)^{-1/3}/\sqrt{m} \\ &< \sqrt{m} - 2^{2/3}a(m/2)^{1/3}/\sqrt{m} + (\frac{6}{20}a^2(\nu/2)^{-1/3} - 2)/\sqrt{m} \\ &= \sqrt{m} - 2^{1/3}am^{-1/6} + (\frac{6}{20}a^2(\nu/2)^{-1/3} - 2)/\sqrt{m}. \end{aligned}$$

Since  $(\nu/2)^{-1/3}$  is clearly decreasing in  $m$  and  $m = 3 \Rightarrow \frac{6}{20}a^2(\nu/2)^{-1/3} < 2$ , as can be verified numerically, the last term will always be negative and can thus be discarded to yield our claim for all  $m \geq 3$ . One can verify the cases  $m = 1, 2$  numerically. Putting everything together yields the desideratum.  $\square$

**Lemma 3.**  $\|g - h\|_\infty \leq \frac{2\ell R}{\sqrt{\pi m}} V_m \left\{ \frac{R\vartheta\lambda}{\sqrt{2\pi/e}} \right\}^m$ .

*Proof.* In the main article we has already shown that

$$\|g - h\|_\infty \leq (2\pi)^{-m/2} \lambda^m \|\tilde{f}\|_1 \mathbb{P}\left\{|\mathbf{n}| \leq \vartheta\sqrt{m}\right\},$$

so all that remains is to bound  $\|\tilde{f}\|_1$  and  $(2\pi)^{-m/2} \lambda^m \mathbb{P}\left\{|\mathbf{n}| \leq \vartheta\sqrt{m}\right\}$ .

Starting with the former, since  $|\tilde{f}(x)| = \rho(|f(a)| - \ell|x - a|)$ ,

$$\|\tilde{f}\|_1 = \int_{\tilde{K}} |\tilde{f}| = \int_K |\tilde{f}| + \int_{\tilde{K}-K} |\tilde{f}| \leq M|K| + \int_{|u| \leq M/\ell} (M - \ell|u|) du.$$

Now,

$$\int_{|u| \leq M/\ell} (M - \ell|u|) du = V_m \int_0^{M/\ell} (M - \ell y) y^{m-1} dy = \frac{V_m M^{m+1}}{\ell^m m(m+1)}.$$

In conjunction with the previous display, this yields that

$$\|\tilde{f}\|_1 \leq M \left( |K| + V_m \frac{(M/\ell)^m}{m(m+1)} \right) \leq M \left( V_m R^m + V_m (M/\ell)^m \right) \leq 2\ell R V_m R^m,$$

because  $M \leq \ell R$ . Indeed, since  $K$  has circumradius  $R$ , it follows that  $\text{diam}(K) \leq 2R$ , so  $2M = \max f - \min f \leq \ell \text{diam}(K) = 2\ell R$  because  $f$  is  $\ell$ -Lipschitz.

As for the latter,  $|\mathfrak{n}|$  has a chi distribution with  $m$  degrees of freedom, so the cdf of  $|\mathfrak{n}|$  may be expressed as  $P(m/2, \diamond^2/2)$  [2, §8.2(i)]. If  $x \geq 0$ , then [2, (8.6.3)]

$$P(a, x) = \frac{x^a}{\Gamma(a)} \int_0^\infty \exp(-at - xe^{-t}) dt \leq \frac{x^a}{\Gamma(a)} \int_0^\infty \exp(-at) dt = \frac{x^a}{a\Gamma(a)}.$$

Additionally  $a\Gamma(a) > (a/e)^a \sqrt{2\pi a}$  for all  $a > 0$  [2, (5.6.1)]. Ergo,

$$\begin{aligned} (2\pi)^{-m/2} \lambda^m \mathbb{P}\{|\mathfrak{n}| \leq \vartheta \sqrt{m}\} &= (2\pi)^{-m/2} \lambda^m P(m/2, m\vartheta^2/2) \\ &< (2\pi)^{-m/2} \lambda^m \frac{1}{\sqrt{\pi m}} \left( \frac{m\vartheta^2/2}{m/2e} \right)^{m/2} \\ &= \frac{1}{\sqrt{\pi m}} \left( \frac{\vartheta \lambda}{\sqrt{2\pi/e}} \right)^m. \end{aligned}$$

Multiplying the obtained bounds readily yields the desideratum. □

**Lemma 4.**  $h = \mathbb{E}(G(\mathfrak{w}, \mathfrak{b})\rho(\langle \mathfrak{w}, \diamond \rangle + \mathfrak{b}))$  on  $K$ , where

- $G(w, b) = -2\sigma R \sqrt{m} \Lambda^2 (2\pi)^{-m/2} \lambda^m |F(\Lambda w)| \Psi(w/\sigma) \left[ |w| \geq \vartheta \sigma \sqrt{m} \right] \cos(\Lambda b - \arg F(\Lambda w));$
- $\mathfrak{b}$  being uniformly distributed on  $[-\sigma R \sqrt{m}, \sigma R \sqrt{m}]$ ;
- $\mathfrak{w} \sim N(0, \sigma I_m)$ .

*Proof.* Letting  $N \sim N(0, \sigma I_m)$  and  $\varphi(v) = \arg F(v)$  allows us to write

$$\begin{aligned}
& (2\pi)^{-m/2} \lambda^m \mathbb{E} \left( |F(\lambda \mathbf{n})| \Psi(\mathbf{n}) \left[ |\mathbf{n}| \geq \vartheta \sqrt{m} \right] c(\mathbf{n}, x) \right) = \\
& (2\pi)^{-m/2} \lambda^m \int |F(\lambda u)| \Psi(u) \left[ |u| \geq \vartheta \sqrt{m} \right] c(\lambda u, x) \delta_Z(u) du = \\
& (2\pi)^{-m/2} \lambda^m \int |F(\Lambda w)| \Psi(w/\sigma) \left[ |w| \geq \vartheta \sigma \sqrt{m} \right] c(\Lambda w, x) \delta_N(w) dw = \\
& \int \left( (2\pi)^{-m/2} \lambda^m |F(\Lambda w)| \left[ |w| \geq \vartheta \sigma \sqrt{m} \right] \Psi(w/\sigma) \right) \\
& \cos(\varphi(\Lambda w) + \Lambda \langle w, x \rangle) \left[ |\langle w, x \rangle| \leq \sigma R \sqrt{m} \right] \delta_N(w) dw,
\end{aligned}$$

since  $|\langle w, x \rangle| \leq |w| \cdot |x|$  and the support of  $\Psi$  is  $\{w \in \mathbb{R}^m : |w| \leq \sqrt{m}\}$ .

Now, using the fundamental theorem of calculus and integration by parts,

$$\begin{aligned}
\cos(\varphi + \Lambda z) \left[ |z| \leq B \right] &= -\Lambda \int_{-\infty}^z \sin(\varphi + \Lambda y) \left[ |y| \leq B \right] dy \\
&= -\Lambda \int \sin(\varphi + \Lambda y) \left[ |y| \leq B \right] \rho(z - y) dy \\
&= -\Lambda^2 \int \cos(\varphi + \Lambda y) \left[ |y| \leq B \right] \rho(z - y) dy \\
&= -\Lambda^2 \int \cos(\varphi - \Lambda b) \rho(z + b) \left[ |b| \leq B \right] db.
\end{aligned}$$

Upon plugging back in, this yields that

$$h(x) = \iint G(w, b) \rho(\langle w, x \rangle + b) \frac{1}{2\sigma R \sqrt{m}} \left[ |b| \leq \sigma R \sqrt{m} \right] \delta_N(w) db dw,$$

which is the expanded form of desired expectation. □

**Lemma 5.** Let  $N_n = \frac{1}{n} \sum_{p=1}^n H_p$  and  $t > 0$ . Then

$$\begin{aligned}
& \mathbb{P} \left\{ \|N_n - \mathbb{E}(H)\|_K > t \right\} \leq \\
& 2 \exp \left( -\frac{n}{2} \left( \frac{t}{2R^2 \sqrt{m} (2\pi)^{-m/2} \lambda^{m+1} (1 + 1/\vartheta) \ell |\tilde{K}|} \right)^2 \right).
\end{aligned}$$

*Proof.* We first prove the existence of the measurable selector  $X_n$ .

To that end, let  $(\Omega, \Sigma)$  be the measurable space underlying  $\mathbb{P}$ . We define

$$\begin{aligned} \xi : \Omega \times K &\ni (\omega, x) \mapsto |N_n(x)(\omega) - \mathbb{E}(H(x))|; \\ \Xi(\omega) &= \operatorname{argmax}_{x \in K} \xi(\omega, x) = \left\{ x \in K : \xi(\omega, x) - \max_{u \in K} \xi(\omega, u) = 0 \right\} \subset K. \end{aligned}$$

Note that  $H(\diamond)(\omega)$  and  $\mathbb{E}(H(\diamond))$  are Lipschitz continuous for all  $\omega \in \Omega$ , and

$$\left\{ \max_{u \in K} \xi(\diamond, u) \leq c \right\} = \bigcap_{u \in K} \{ \xi(\diamond, u) \leq c \} = \bigcap_{q \in S} \{ \xi(\diamond, q) \leq c \},$$

where  $S$  is a countably dense subset of  $K$ , whence  $\max_{u \in K} \xi(\diamond, u)$  is measurable. Ergo,

$$\Omega \times K \ni (\omega, x) \mapsto \xi(\omega, x) - \max_{u \in K} \xi(\omega, u)$$

is a Carathéodory function [1, def. 4.50]. Since  $K$  is a compact subset of  $\mathbb{R}^m$ , it follows that  $\Xi$  is a (weakly) [1, lem. 18.2] measurable [1, cor. 18.8] correspondence [1, def. 17.1] with nonempty closed values from a measurable space into a Polish space. Thus  $\Xi$  admits a measurable selector [1, thm 18.13], that is, there exists a random variable

$$X_n : \Omega \ni \omega \mapsto X_n(\omega) \in \Xi(\omega)$$

such that  $|N_n(X_n) - \mathbb{E}(H(X_n))| = \|N_n - \mathbb{E}(H)\|_K$ .

In order to apply Hoeffding's inequality to

$$\mathbb{P} \left\{ \|N_n - \mathbb{E}(H)\|_K > t \right\} = \mathbb{P} \left\{ |N_n(X_n) - \mathbb{E}(H(X_n))| > t \right\},$$

we need to bound  $H(X_n)$  a.s., which we can do as follows.

$$\begin{aligned} |H(X_n)| &= |G(\mathbf{w}, \mathfrak{b})\rho(\langle \mathbf{w}, X_n \rangle + \mathfrak{b})| \leq \\ 2\sigma R\sqrt{m}\Lambda^2(2\pi)^{-m/2}\lambda^m |F(\Lambda\mathbf{w})| \cdot |\Psi(w/\sigma)| \left( \langle \mathbf{w}, X_n \rangle + \sigma R\sqrt{m} \right) \mathbb{1}_{|w| \geq \vartheta\sigma\sqrt{m}} &\leq \\ 2\sigma R\sqrt{m}\Lambda(2\pi)^{-m/2}\lambda^m \left( \Lambda |F(\Lambda\mathbf{w})| \right) R(1 + 1/\vartheta) |w| &\leq \\ 2R^2\sqrt{m}(2\pi)^{-m/2}\lambda^{m+1}(1 + 1/\vartheta) \left\| |\Lambda\diamond| \cdot |F(\Lambda\diamond)| \right\|_{\infty} &= \\ 2R^2\sqrt{m}(2\pi)^{-m/2}\lambda^{m+1}(1 + 1/\vartheta) \left\| |\diamond| \cdot |F(\diamond)| \right\|_{\infty}, & \end{aligned}$$

because  $|\Psi| \leq 1$  and  $X_n(\omega) \in K$ . Now, using the fact that  $\|\mathcal{F}\{\diamond\}\|_\infty \leq \|\diamond\|_1$  and utilizing Minkowski's integral inequality twice yields that

$$\begin{aligned} \left\| |\diamond| \cdot |F(\diamond)| \right\|_\infty &= \left\| |\{\diamond_p F(\diamond)\}_{p=1}^m| \right\|_\infty \leq \left\| \left\{ \|\diamond_p F(\diamond)\|_\infty \right\}_{p=1}^m \right\| \\ &= \left\| \left\{ \|\mathcal{F}\{\partial_p \tilde{f}\}\|_\infty \right\}_{p=1}^m \right\| \leq \left\| \left\{ \|\partial_p \tilde{f}\|_1 \right\}_{p=1}^m \right\| \\ &\leq \left\| |\{\partial_p \tilde{f}\}_{p=1}^m| \right\|_1 = \|\nabla \tilde{f}\|_1 \leq \ell |\tilde{K}|, \end{aligned}$$

so  $H(X_n)$  is (a.s.) bounded by  $2R^2 \sqrt{m} (2\pi)^{-m/2} \lambda^{m+1} (1 + 1/\vartheta) \ell |\tilde{K}|$ . Here,  $|\{\diamond_p\}_{p=1}^m|$  denotes the Euclidean norm of the vector  $\{\diamond_p\}_{p=1}^m \in \mathbb{R}^m$ .

Above we implicitly used Rademacher's theorem to conclude that  $\nabla \tilde{f}$  exists a.e. We also used that  $\|\nabla \tilde{f}\|_\infty \leq \ell$ , which can be seen as follows.

It suffices to show that  $|\nabla \tilde{f}(x)| \leq \ell$  for all  $x \in \tilde{K}$  for which  $\nabla \tilde{f}(x)$  exists. Suppose  $x \in \tilde{K}$  is such that  $\nabla \tilde{f}(x)$  exists. If  $\nabla \tilde{f}(x) = 0$ , there is nothing to prove, so we may additionally assume that  $\nabla \tilde{f}(x) \neq 0$ . For almost every such  $x$  it holds that

$$\begin{aligned} \lim_{h \rightarrow 0} \left| \frac{|\tilde{f}(x + hu) - \tilde{f}(x)|}{h} - |\nabla \tilde{f}(x)| \right| &\leq \lim_{h \rightarrow 0} \left| \frac{\tilde{f}(x + hu) - \tilde{f}(x)}{h} - |\nabla \tilde{f}(x)| \right| \\ &= \lim_{h \rightarrow 0} \frac{|\tilde{f}(x + hu) - \tilde{f}(x) - \langle hu, \nabla \tilde{f}(x) \rangle|}{|hu|} = 0, \end{aligned}$$

where  $u = \frac{\nabla \tilde{f}(x)}{|\nabla \tilde{f}(x)|}$  and  $h > 0$ . As such,

$$|\nabla \tilde{f}(x)| = \lim_{h \rightarrow 0} \frac{|\tilde{f}(x + hu) - \tilde{f}(x)|}{h} \leq \ell,$$

because  $u$  is a unit vector.

The claim of the lemma then follows from directly applying Hoeffding's inequality.  $\square$

## References

- [1] D Charalambos and Border Aliprantis. *Infinite Dimensional Analysis: A Hitchhiker's Guide*. Springer-Verlag Berlin and Heidelberg GmbH & Company KG, 2013.



- [2] *NIST Digital Library of Mathematical Functions*. <https://dlmf.nist.gov/>, Release 1.1.9 of 2023-03-15. F. W. J. Olver, A. B. Olde Daalhuis, D. W. Lozier, B. I. Schneider, R. F. Boisvert, C. W. Clark, B. R. Miller, B. V. Saunders, H. S. Cohl, and M. A. McClain, eds.
- [3] Werner Ehm, Tilmann Gneiting, and Donald Richards. “Convolution Roots of Radial Positive Definite Functions with Compact Support”. In: *Transactions of the American Mathematical Society* 356.11 (2004), pp. 4655–4685.
- [4] Edward James McShane. “Extension of range of functions”. In: *Bulletin of the American Mathematical Society* 40.12 (1934).
- [5] C Qu and R Wong. ““Best possible” upper and lower bounds for the zeros of the Bessel function  $J_\nu(x)$ ”. In: *Transactions of the American Mathematical Society* 351.7 (1999), pp. 2833–2859.
- [6] James G Wendel. “Note on the gamma function”. In: *The American Mathematical Monthly* 55.9 (1948), pp. 563–564.
